# Supplementary material
Source: PubMed Central journal article supplement (PMC6830788)
Supplement: ASN.2019060594SupplementaryData.pdf [file ASN.2019060594SupplementaryData.pdf]

## Supplemental information table of contents

**Table S1.** Detailed p-values for percentile pairwise tests. Class I.

**Table S2.** Detailed p-values for percentile pairwise tests. Class II.

**Table S3.** P-values for Welch's t-test statistics between groups of measurements across important clinical time intervals (3, 4 and 6 months).

**Table S4.** Detailed values for percentile pairwise tests without immunized patients and measurements made closer than 30 days apart. Class I.

**Table S5.** Detailed values for percentile pairwise tests without immunized patients and measurements made closer than 30 days apart. Class II.

**Table S6.** Detailed p-values for percentile pairwise tests over the number of crossings over the clinical cut-off MFI=1000. Class I.

**Table S7.** Detailed p-values for percentile pairwise tests over the number of crossings over the clinical cut-off MFI=1000. Class II.

**Table S8.** Detailed p-values for percentile pairwise tests over the number of crossings over the clinical cut-off MFI=5000. Class I.

**Table S9.** Detailed p-values for percentile pairwise tests over the number of crossings over the clinical cut-off MFI=5000. Class II.

**Table S10.** Percentage of patients with more than N crossings of the 1000, 5000 and 10 000 MFI threshold (class I) pre-transplant, stratified on documented previous immunizing events.

**Table S11.** Percentage of patients with more than N crossings of the 1000, 5000 and 10 000 MFI threshold (class II) pre-transplant, stratified on documented previous immunizing events.

**Table S12.** Percentage of patients with at least one SAB specificity showing increase in MFI from <1000 MFI to >5000 MFI pre-transplant, stratified on documented previous immunizing events.

Figure S1. MFI variability is, on average, not affected by the interval between measurements (IBM) in patients without documented immunizing events.

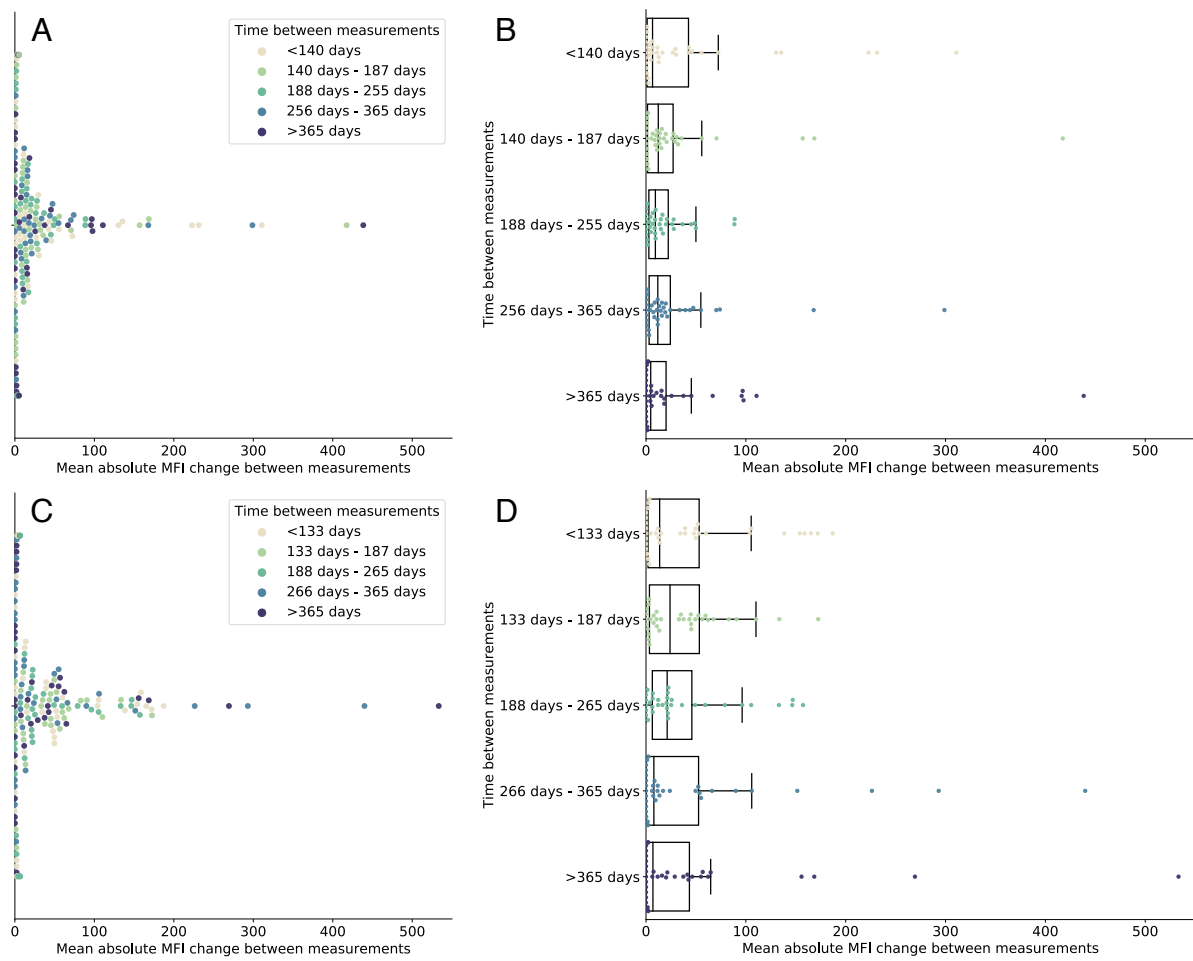

Figure S2. Gender or age does not affect pre-transplant MFI variability.

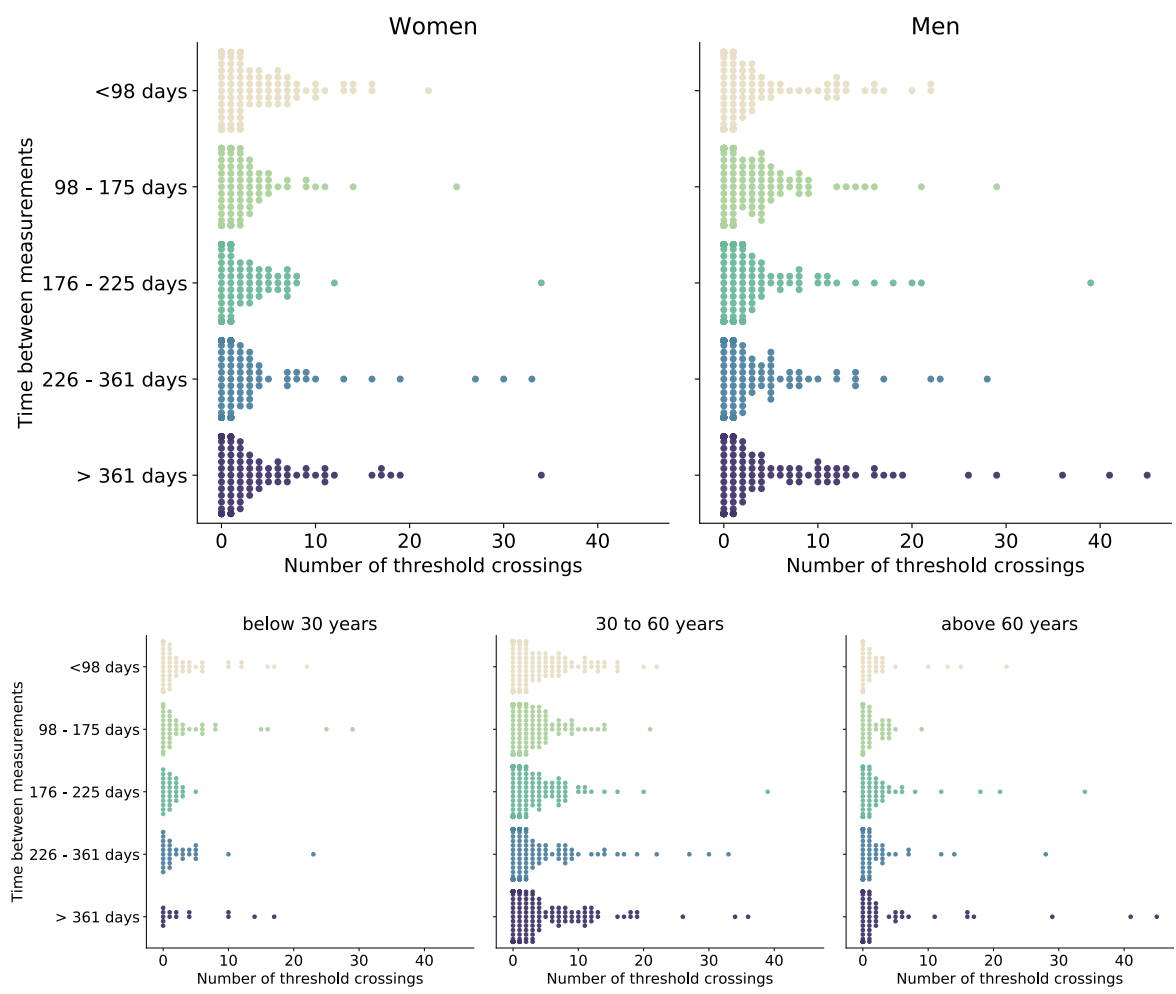

Figure S3. The alloimmunization history affects pre-transplant MFI variability.

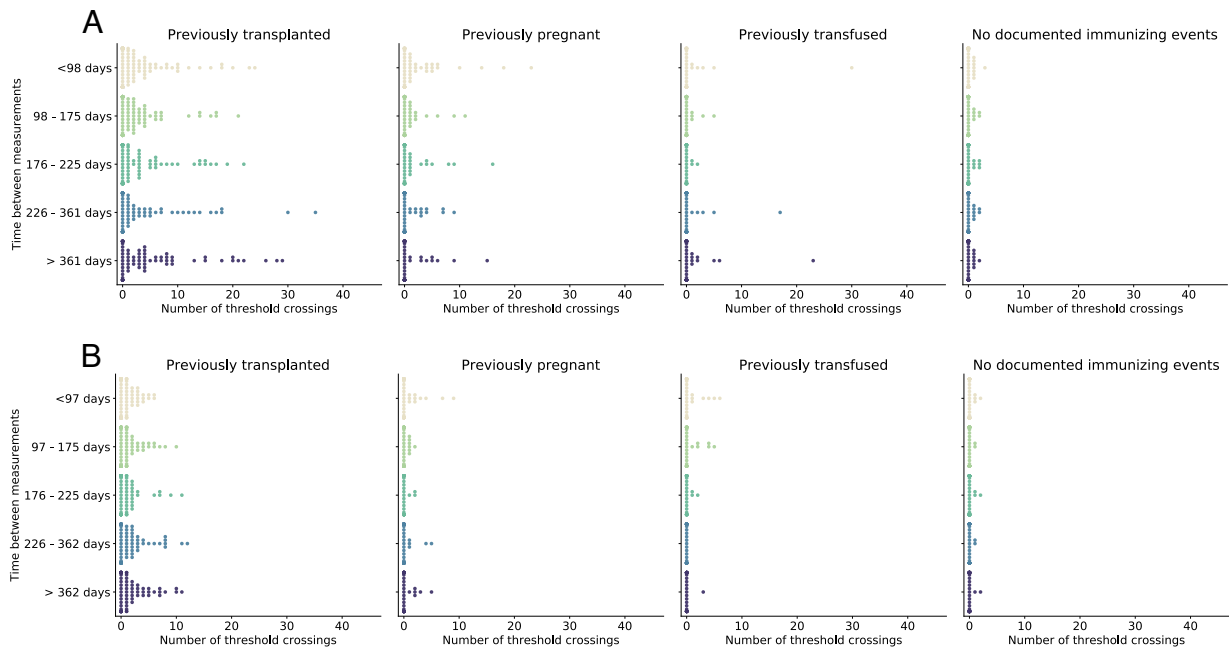

Figure S4. Mean total MFI change after transfusions occurring during the waiting time.

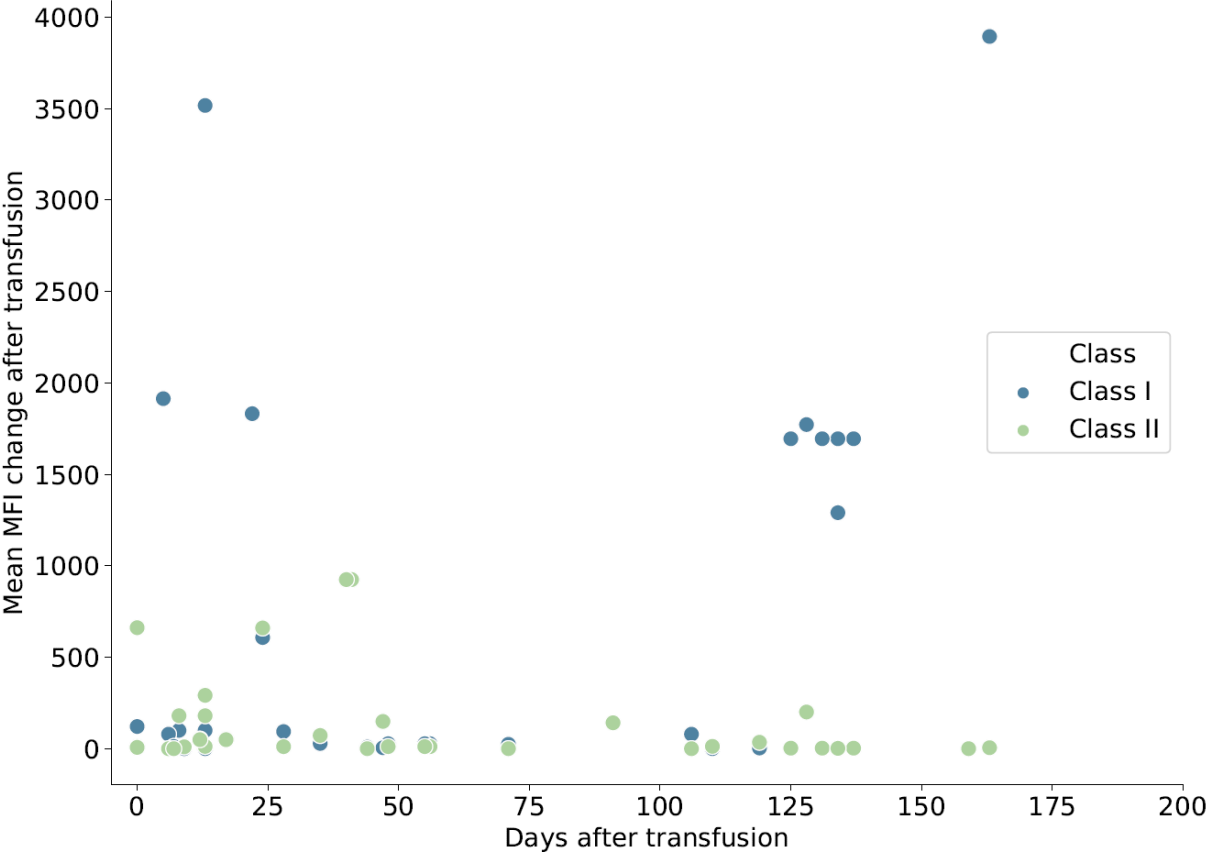

Table S1. Detailed p-values for percentile pairwise tests. Class I.

|                     | <98 days | 98 days - 175 days: | 176 days - 225 days | 226 days - 361 days | > 361 days |
|---------------------|----------|---------------------|---------------------|---------------------|------------|
| <98 days            |          | 0.00954             | 0.16152             | 0.07960             | 0.91378    |
| 98 days - 175 days: |          |                     | 0.26924             | 0.46471             | 0.01884    |
| 176 days - 225 days |          |                     |                     | 0.72639             | 0.21631    |
| 226 days - 361 days |          |                     |                     |                     | 0.11580    |
| > 361 days          |          |                     |                     |                     |            |

Table S2. Detailed p-values for percentile pairwise tests. Class II.

|                     | <97 days | 97 days - 175 days: | 176 days - 225 days | 226 days - 362 days | > 362 days |
|---------------------|----------|---------------------|---------------------|---------------------|------------|
| <97 days            |          | 0.71681             | 0.31121             | 0.89956             | 0.27325    |
| 97 days - 175 days: |          |                     | 0.50188             | 0.67425             | 0.16082    |
| 176 days - 225 days |          |                     |                     | 0.34266             | 0.05541    |
| 226 days - 362 days |          |                     |                     |                     | 0.40267    |
| > 362 days          |          |                     |                     |                     |            |

Table S3. P-values for Welch's t-test statistics between groups of measurements across important clinical time intervals (3, 4 and 6 months).

|          | Class I        |                   | Class II       |                   |
|----------|----------------|-------------------|----------------|-------------------|
|          | With immunized | Without immunized | With immunized | Without immunized |
| 3 months | 0.06373        | 0.94191           | 0.77056        | 0.53905           |
| 4 months | 0.27305        | 0.88502           | 0.59098        | 0.46024           |
| 6 months | 0.71886        | 0.89899           | 0.49940        | 0.71302           |

Table S4. Detailed values for percentile pairwise tests without immunized patients and measurements made closer than 30 days apart. Class I.

|                      | <140 days | 140 days - 187 days: | 188 days - 255 days | 256 days - 365 days | > 365 days |
|----------------------|-----------|----------------------|---------------------|---------------------|------------|
| <140 days            |           | 0.67765              | 0.08365             | 0.47584             | 0.62537    |
| 140 days - 187 days: |           |                      | 0.23153             | 0.80525             | 0.93078    |
| 188 days - 255 days  |           |                      |                     | 0.24689             | 0.31032    |
| 256 days - 365 days  |           |                      |                     |                     | 0.88932    |
| > 365 days           |           |                      |                     |                     |            |

Table S5. Detailed values for percentile pairwise tests without immunized patients and measurements made closer than 30 days apart. Class II.

|                      | <133 days | 133 days - 187 days: | 188 days - 265 days | 266 days - 365 days | > 365 days |
|----------------------|-----------|----------------------|---------------------|---------------------|------------|
| <133 days            |           | 0.44897              | 0.53719             | 0.92756             | 0.98960    |
| 133 days - 187 days: |           |                      | 0.91364             | 0.53248             | 0.61052    |
| 188 days - 265 days  |           |                      |                     | 0.59027             | 0.66522    |
| 266 days - 365 days  |           |                      |                     |                     | 0.95064    |
| > 365 days           |           |                      |                     |                     |            |

Table S6. Detailed p-values for percentile pairwise tests over the number of crossings over the clinical cut-off MFI=1000. Class I.

|                     | <98 days | 98 days - 175 days: | 176 days - 225 days | 226 days - 361 days | > 361 days |
|---------------------|----------|---------------------|---------------------|---------------------|------------|
| <98 days            |          | 0.12826             | 0.21375             | 0.47844             | 0.13927    |
| 98 days - 175 days: |          |                     | 0.86042             | 0.50212             | 0.00704    |
| 176 days - 225 days |          |                     |                     | 0.63728             | 0.01453    |
| 226 days - 361 days |          |                     |                     |                     | 0.04659    |
| > 361 days          |          |                     |                     |                     |            |

Table S7. Detailed p-values for percentile pairwise tests over the number of crossings over the clinical cut-off MFI=1000. Class II.

|                     | <97 days | 97 days - 175 days: | 176 days - 225 days | 226 days - 362 days | > 362 days |
|---------------------|----------|---------------------|---------------------|---------------------|------------|
| <97 days            |          | 0.73094             | 0.95973             | 0.82772             | 0.02806    |
| 97 days - 175 days: |          |                     | 0.74687             | 0.91505             | 0.00871    |
| 176 days - 225 days |          |                     |                     | 0.85289             | 0.01742    |
| 226 days - 362 days |          |                     |                     |                     | 0.01747    |
| > 362 days          |          |                     |                     |                     |            |

Table S8. Detailed p-values for percentile pairwise tests over the number of crossings over the clinical cut-off MFI=5000. Class I.

|                     | <98 days | 98 days - 175 days: | 176 days - 225 days | 226 days - 361 days | > 361 days |
|---------------------|----------|---------------------|---------------------|---------------------|------------|
| <98 days            |          | 0.04489             | 0.14690             | 0.27112             | 0.87147    |
| 98 days - 175 days: |          |                     | 0.59026             | 0.43918             | 0.04146    |
| 176 days - 225 days |          |                     |                     | 0.78560             | 0.12664    |
| 226 days - 361 days |          |                     |                     |                     | 0.23028    |
| > 361 days          |          |                     |                     |                     |            |

Table S9. Detailed p-values for percentile pairwise tests over the number of crossings over the clinical cut-off MFI=5000. Class II.

|                     | <97 days | 97 days - 175 days: | 176 days - 225 days | 226 days - 362 days | > 362 days |
|---------------------|----------|---------------------|---------------------|---------------------|------------|
| <97 days            |          | 0.71673             | 0.11055             | 0.97677             | 0.65514    |
| 97 days - 175 days: |          |                     | 0.22686             | 0.72822             | 0.44599    |
| 176 days - 225 days |          |                     |                     | 0.15655             | 0.06545    |
| 226 days - 362 days |          |                     |                     |                     | 0.70667    |
| > 362 days          |          |                     |                     |                     |            |



Table S10. Percentage of patients with more than N crossings of the 1000, 5000 and 10 000 MFI threshold (class I) pre-transplant, stratified on documented previous immunizing events.

|                         | 1000 MFI        |                 | 5000 MFI        |                 | 10 000 MFI      |                 |
|-------------------------|-----------------|-----------------|-----------------|-----------------|-----------------|-----------------|
|                         | N crossings > 0 | N crossings > 1 | N crossings > 0 | N crossings > 1 | N crossings > 0 | N crossings > 1 |
| None of the previous    | 41.79 %         | 19.40 %         | 10.15 %         | 2.69 %          | 1.19 %          | 0.30 %          |
| Previously pregnant     | 59.85 %         | 34.47 %         | 28.79 %         | 18.18 %         | 13.64 %         | 8.33 %          |
| Previously transfused   | 51.44 %         | 27.88 %         | 13.46 %         | 7.69 %          | 4.33 %          | 2.40 %          |
| Previously transplanted | 74.11 %         | 59.29 %         | 50.66 %         | 39.38 %         | 34.73 %         | 26.33 %         |

Table S11. Percentage of patients with more than N crossings of the 1000, 5000 and 10 000 MFI threshold (class II) pre-transplant, stratified on documented previous immunizing events.

|                         | 1000 MFI        |                 | 5000 MFI        |                 | 10 000 MFI      |                 |
|-------------------------|-----------------|-----------------|-----------------|-----------------|-----------------|-----------------|
|                         | N crossings > 0 | N crossings > 1 | N crossings > 0 | N crossings > 1 | N crossings > 0 | N crossings > 1 |
| None of the previous    | 38.80 %         | 20.07 %         | 4.35 %          | 1.00 %          | 0.33 %          | 0.33 %          |
| Previously pregnant     | 47.81 %         | 27.89 %         | 12.65 %         | 6.77 %          | 7.57 %          | 3.59 %          |
| Previously transfused   | 42.11 %         | 21.58 %         | 8.95 %          | 5.79 %          | 1.05 %          | 1.05 %          |
| Previously transplanted | 63.42 %         | 41.12 %         | 39.61 %         | 22.73 %         | 32.25 %         | 18.40 %         |

Table S12. Percentage of patients with at least one SAB specificity showing increase in MFI from <1000 MFI to >5000 MFI pre-transplant, stratified on documented previous immunizing events.

|                         | Class I | Class II |
|-------------------------|---------|----------|
| None of the previous    | 0.30 %  | 0.33 %   |
| Previously pregnant     | 1.52 %  | 1.59 %   |
| Previously transfused   | 1.92 %  | 1.05 %   |
| Previously transplanted | 9.51 %  | 6.71 %   |
